# Supplementary material for: Interpretable spatial cell learning enhances the characterization of patient tissue microenvironments with highly multiplexed imaging data
Source: PubMed Central journal article supplement (PMC10081219; doi:10.1101/2023.03.26.534306), 2023-03-28
Supplement: NIHPP2023.03.26.534306v1-supplement-1.pdf [file NIHPP2023.03.26.534306v1-supplement-1.pdf]

## Supplementary Figures

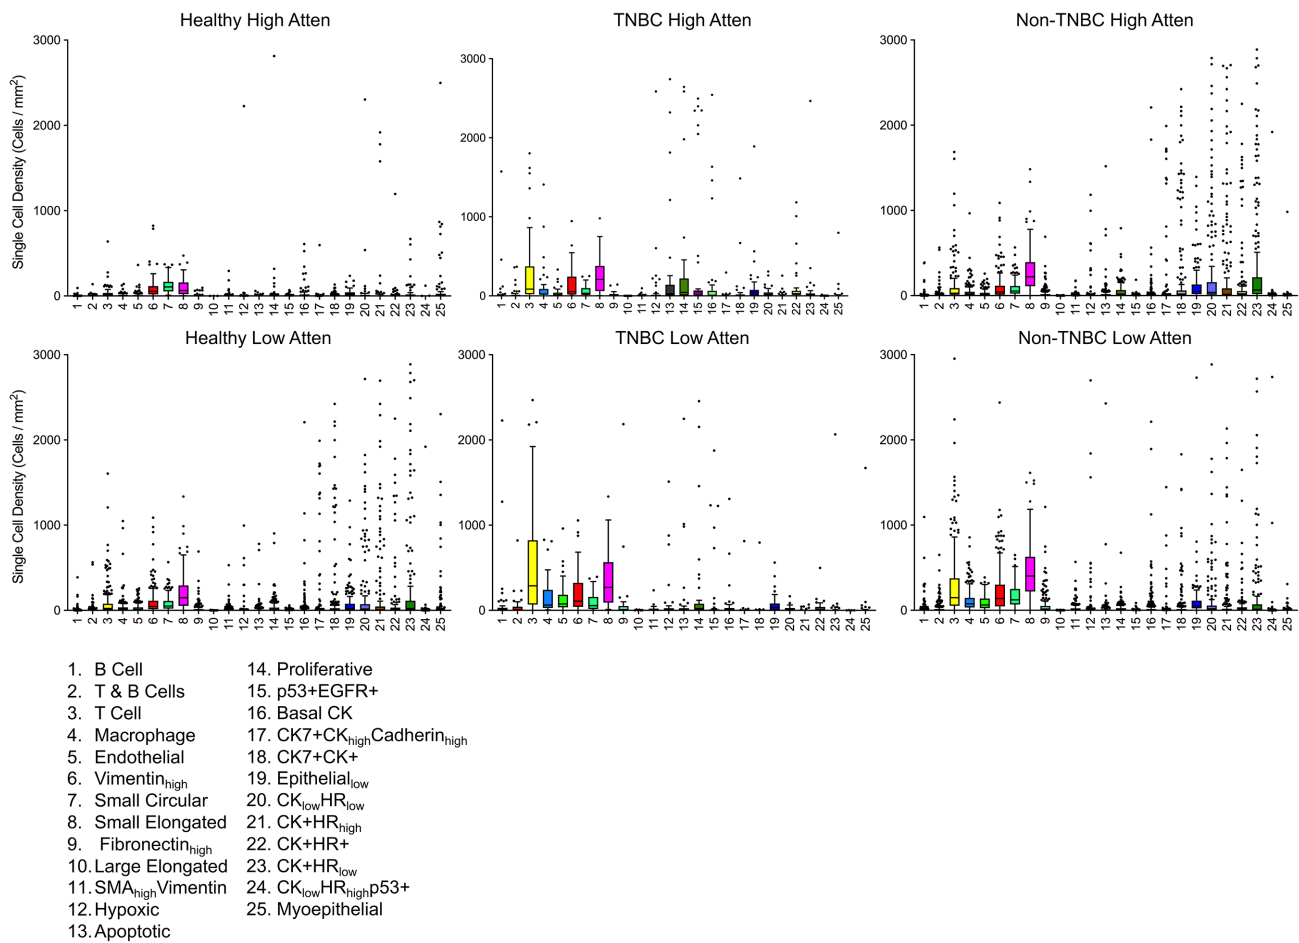

**Supplementary Figure 1.** Box plots of cell density per phenotype in high- and low-attention regions from healthy, TNBC and non-TNBC cancer tissues.

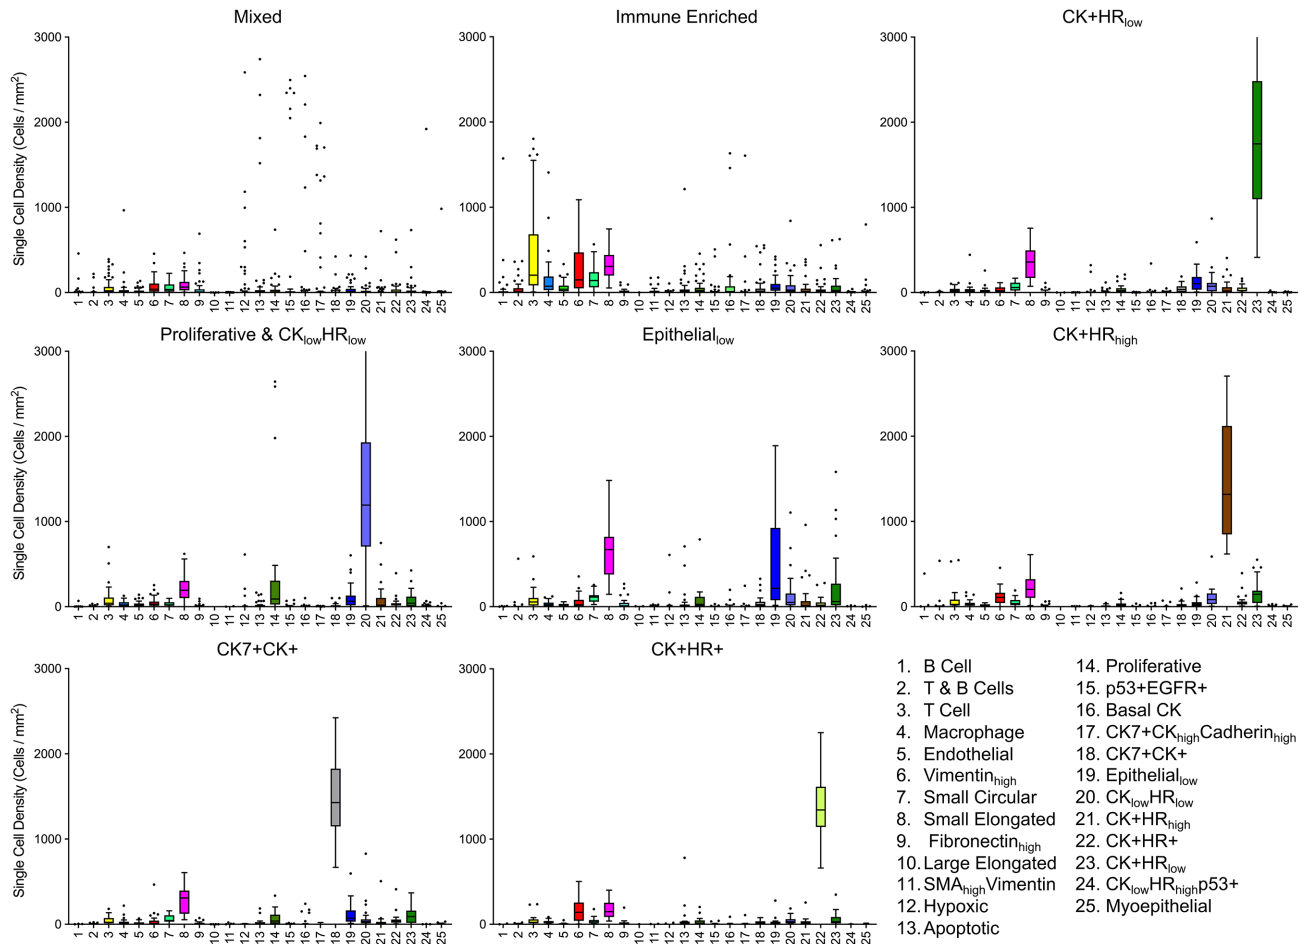

**Supplementary Figure 2.** Box plots of cell density per phenotype in high-attention regions from each single-cell patient subgroup.

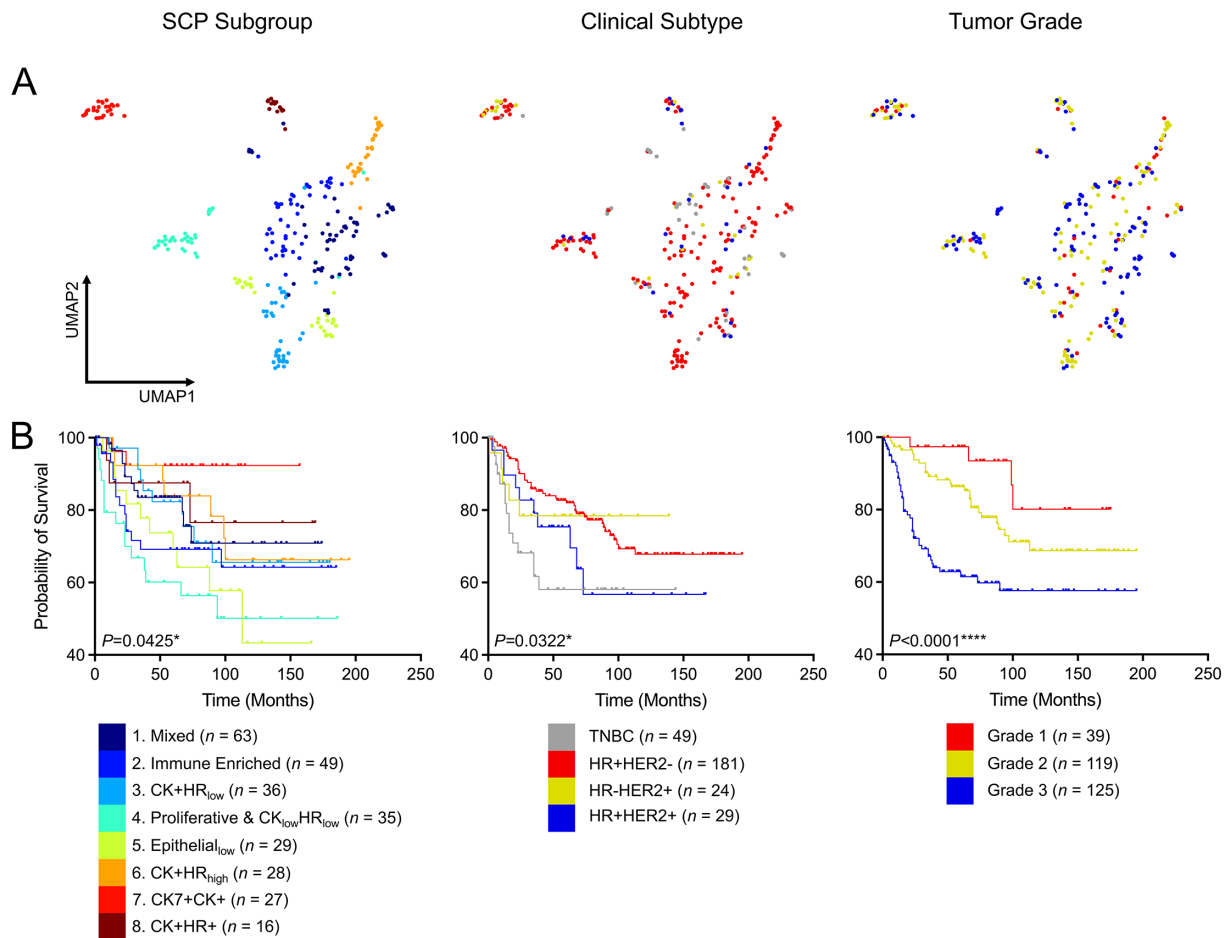

**Supplementary Figure 3.** Comparisons of the patient group classified by SCP subgroup, clinical subtype and tumor grade. (A) UMAP plots of the tissues labeled with their corresponding SCP indexes, clinical subtypes and tumor grades. (B) Kaplan-Meier curves of overall survival for each patient group on the basis of SCP subgroup, clinical subtype and tumor grade.

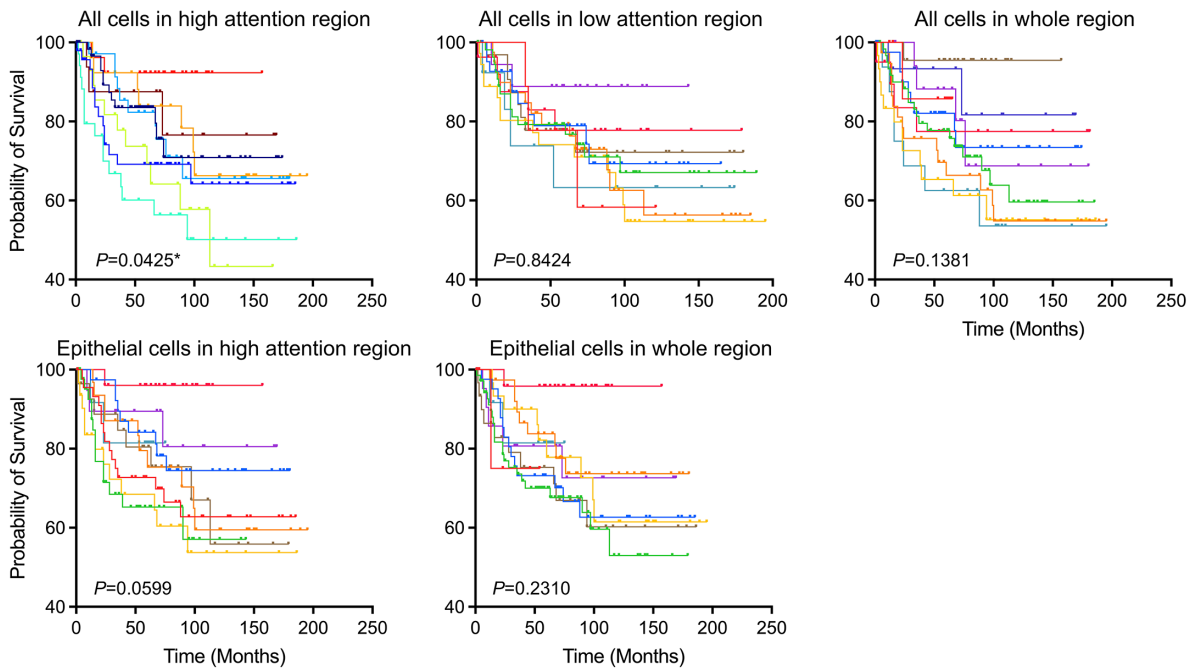

**Supplementary Figure 4.** Kaplan-Meier curves of overall survival from different clustering strategies and their corresponding  $P$  values of log-rank tests.

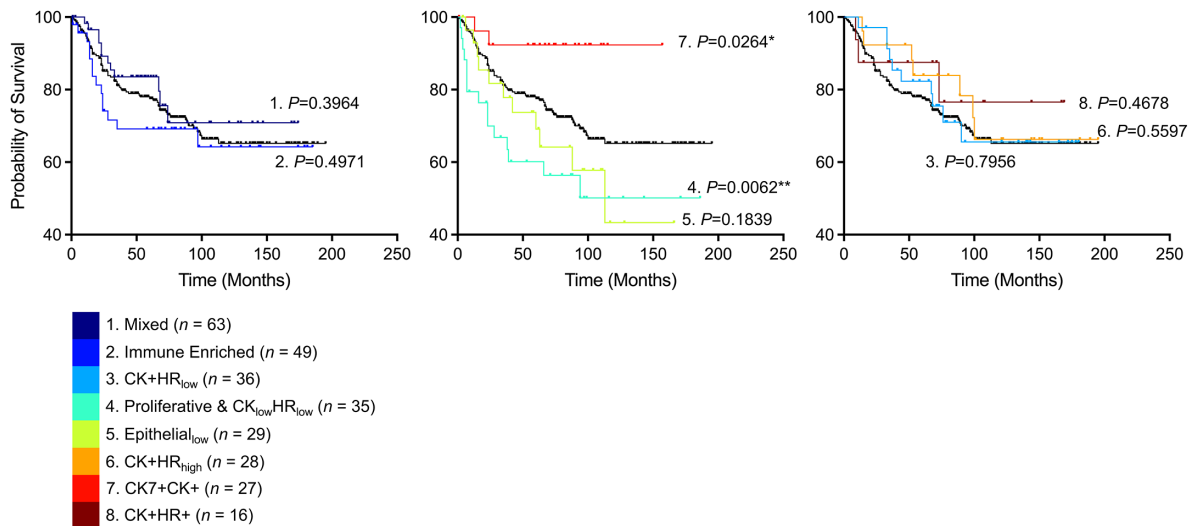

**Supplementary Figure 5.** Kaplan-Meier curves of overall survival of each subgroup on the basis of cell density per phenotype of high attention regions. The black curve represents the survival curve of all samples. Each  $P$  value represents the statistical significance of a single subgroup compared to all the other samples. All the  $P$  values were calculated through two-sided log-rank tests.

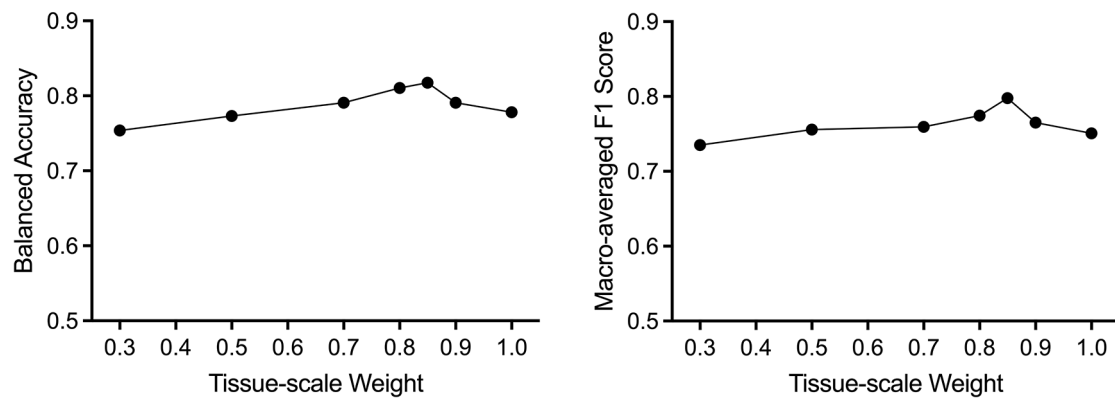

**Supplementary Figure 6.** The relationship between tissue-scale weight  $\eta$  and clinical type classification performance.

## Supplementary Tables

**Supplementary Table 1.** Cell markers used in training and downstream analysis.

| Metal Tag | Target                    | Metal Tag | Target                |
|-----------|---------------------------|-----------|-----------------------|
| 141Pr     | Cytokeratin5              | 159Tb     | p53                   |
| 142Nd     | Fibronectin               | 160Gd     | CD44                  |
| 143Nd     | Cytokeratin19             | 162Dy     | CD45                  |
| 144Nd     | Cytokeratin8/18           | 163Dy     | GATA3                 |
| 145Nd     | Twist                     | 164Dy     | CD20                  |
| 146Nd     | CD68                      | 166Er     | Carbonic Anhydrase IX |
| 147Sm     | Cytokeratin14             | 167Er     | E/P-Cadherin          |
| 148Nd     | SMA                       | 168Er     | Ki-67                 |
| 149Sm     | Vimentin                  | 169Tm     | EGFR                  |
| 150Nd     | c-Myc                     | 170Er     | S6                    |
| 151Eu     | c-erbB-2-Her2             | 172Yb     | vWF                   |
| 152Sm     | CD3                       | 173Yb     | mTOR                  |
| 155Gd     | Slug                      | 174Yb     | Cytokeratin7          |
| 156Gd     | Rabbit IgG H L            | 175Lu     | panCytokeratin        |
| 158Gd     | Progesterone Receptor A/B | 176Yb     | cleaved PARP          |

**Supplementary Table 2.** *P* values for overall survival analysis from different clustering strategies.

| Cell Types       | Region         | <i>P</i> Value |
|------------------|----------------|----------------|
| All              | High attention | 0.0425*        |
| All              | Low attention  | 0.8424         |
| All              | Whole          | 0.1381         |
| Epithelial cells | High attention | 0.0599         |
| Epithelial cells | Whole          | 0.2310         |
